# Supplementary material for: Streptomyces as Potential Synthetic Polymer Degraders: A Systematic Review
Source: MDPI journal article supplement (doi:10.3390/bioengineering8110154), 2021-10-23
Supplement: s1 [file s1]

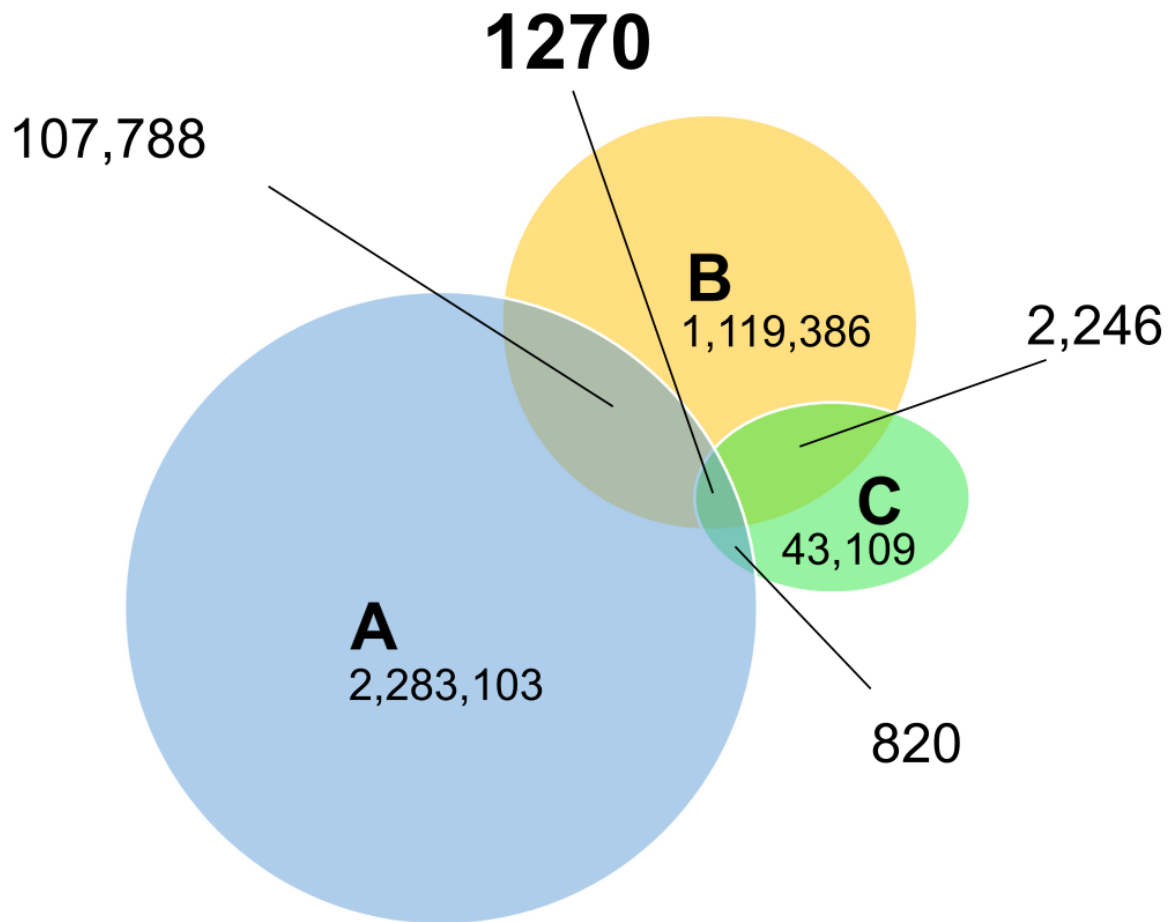

**Figure S1.** Venn diagram analysis showing the distribution and relationship between hit results of the search equations. Set A is the number of hits of the plastics-related terms, Set B is the number of hits of the degradation-related terms and set C is the number of hits of the *Streptomyces* term. The circle sizes is not a scale, their intetion is to provide a visual idea of the differences.
